# Supplementary material for: Determination and Similarity Analysis of PM2.5 Emission Source Profiles Based on Organic Markers for Monterrey, Mexico
Source: MDPI journal article supplement (doi:10.3390/atmos12050554), 2021-04-26
Supplement: s1 [file s1]

## SUPPLEMENTARY MATERIAL

# Determination and Similarity Analysis of PM<sub>2.5</sub> Emission Source Profiles Based on Organic Markers for Monterrey, Mexico

Yasmany Mancilla <sup>1</sup>, Gerardo Medina <sup>2</sup>, Lucy T. González <sup>1</sup>, Pierre Herckes <sup>2</sup>, Matthew P. Fraser <sup>3</sup>  
and Alberto Mendoza <sup>1,\*</sup>

<sup>1</sup> Tecnológico de Monterrey, School of Engineering and Sciences, Ave. Eugenio Garza Sada 2501, Monterrey, N.L., Mexico 64849; y.mancilla@tec.mx (Y.M.); gerardo.medina89@gmail.com (G.M.); lucy.gonzalez@tec.mx (L.T.G.); mendoza.alberto@tec.mx (A.M.)

<sup>2</sup> School of Molecular Sciences, Arizona State University, Tempe, AZ 85287, United States; Pierre.Herckes@asu.edu

<sup>3</sup> School of Sustainable Engineering and the Built Environment, Arizona State University, Tempe, AZ 85287, United States; matthew.fraser@asu.edu

\* Correspondence: mendoza.alberto@tec.mx

**Table S1.** Organic composition of organic markers (ng/mg) for each source emission profile. Codes are per Table 2 of the manuscript; ND = not detected.

| Code | CAF      | CAR      | CAS      | TLL      | CC       | TP       | PMX      | PSN      | QB       | RTD      | RTN      | RP       |
|------|----------|----------|----------|----------|----------|----------|----------|----------|----------|----------|----------|----------|
| C19  | ND       | ND       | ND       | 1.60E+00 | 2.31E+01 | 9.56E+00 | ND       | ND       | ND       | ND       | ND       | ND       |
| C20  | 2.76E+00 | ND       | ND       | 5.90E+00 | 3.89E+02 | 2.26E+01 | ND       | ND       | 7.37E+00 | ND       | ND       | ND       |
| C21  | ND       | ND       | 6.61E+01 | 9.16E+00 | ND       | 2.32E+01 | ND       | ND       | 2.51E+01 | ND       | ND       | ND       |
| C22  | 2.73E+01 | ND       | 4.38E+01 | 1.44E+02 | 1.29E+02 | 1.74E+01 | ND       | ND       | 1.62E+01 | ND       | ND       | ND       |
| C23  | 7.51E+00 | 4.97E+00 | 2.96E+01 | 4.62E+02 | 3.08E+02 | 7.00E+01 | 3.51E+01 | ND       | 2.48E+01 | 5.10E+01 | 1.33E+01 | ND       |
| C24  | 6.75E-01 | 5.32E+00 | 8.62E+01 | 8.07E+02 | 4.54E+02 | 1.24E+02 | 1.19E+02 | 1.23E+02 | 5.96E+01 | 1.10E+02 | 4.91E+01 | 7.52E+01 |
| C25  | 1.66E+01 | 9.77E+00 | 3.93E+01 | 1.15E+03 | 5.51E+02 | 1.57E+02 | 1.47E+02 | 1.59E+02 | 7.88E+01 | 1.49E+02 | 6.63E+01 | 9.05E+01 |
| C26  | ND       | 3.77E+00 | 1.20E+01 | 5.16E+02 | 2.27E+02 | 1.15E+02 | 8.03E+01 | 1.04E+02 | 6.00E+01 | 1.13E+02 | 4.86E+01 | 4.92E+01 |
| C27  | 1.57E+02 | 1.11E+01 | 1.43E+01 | 5.40E+02 | 2.81E+02 | 1.34E+02 | 1.06E+02 | 1.35E+02 | 1.09E+02 | 1.44E+02 | 6.21E+01 | 6.24E+01 |
| C28  | 9.16E+01 | 1.43E+01 | 1.51E+01 | 7.41E+02 | 2.97E+02 | 1.83E+02 | 1.08E+02 | 1.68E+02 | 9.73E+01 | 1.58E+02 | 6.12E+01 | 7.63E+01 |
| C29  | 4.56E+01 | 2.28E+01 | 1.47E+01 | 5.97E+02 | 3.19E+02 | 1.41E+02 | 1.13E+02 | 1.19E+02 | 8.57E+01 | 1.79E+02 | 7.36E+01 | 6.47E+01 |
| C30  | 3.44E+01 | 1.02E+01 | 0.00E+00 | 5.88E+02 | 2.51E+02 | 1.18E+02 | 9.17E+01 | 9.71E+01 | 6.99E+01 | 1.37E+02 | 5.48E+01 | 5.33E+01 |
| C31  | 3.85E+01 | 9.36E+00 | 1.50E+01 | 5.60E+02 | 2.78E+02 | 1.43E+02 | 8.34E+01 | 1.16E+02 | 4.13E+01 | 1.40E+02 | 5.01E+01 | 5.20E+01 |
| C32  | ND       | ND       | ND       | 3.59E+02 | 1.05E+02 | 5.74E+01 | ND       | 3.76E+01 | 2.45E+01 | 8.03E+01 | 2.90E+01 | 6.29E+00 |
| C33  | ND       | ND       | ND       | 2.16E+02 | 6.26E+01 | 4.87E+01 | ND       | 8.64E+00 | 3.25E+01 | 5.94E+01 | 1.95E+01 | ND       |
| C34  | ND       | 5.88E+00 | ND       | ND       |
| HOP1 | 2.50E+00 | ND       | ND       | 6.76E+00 | 2.08E+01 | 6.32E+00 | 3.62E+01 | 3.08E+01 | ND       | 1.71E+01 | 1.04E+01 | 3.23E+00 |
| HOP2 | 2.99E+00 | ND       | ND       | 1.02E+01 | 1.59E+01 | 5.52E+00 | 5.32E+00 | ND       | ND       | 1.15E+00 | 3.04E+00 | ND       |
| HOP3 | 4.54E+00 | ND       | ND       | 4.15E+01 | 5.17E+01 | 1.70E+01 | 1.74E+01 | ND       | ND       | 3.58E+00 | 5.64E+00 | ND       |
| HOP4 | 5.28E-01 | ND       | ND       | 8.62E+00 | 1.45E+01 | 4.49E+00 | 2.27E+01 | ND       | ND       | 7.33E+00 | 1.26E+00 | ND       |

|          |          |          |          |          |          |          |          |          |          |          |          |          |
|----------|----------|----------|----------|----------|----------|----------|----------|----------|----------|----------|----------|----------|
| HOP5     | 5.95E+00 | ND       | ND       | 4.60E+01 | 7.29E+01 | 2.06E+01 | 4.77E+01 | ND       | ND       | 1.49E+01 | 1.08E+01 | ND       |
| HOP6     | ND       | ND       | ND       | 2.29E+01 | 2.40E+01 | 7.89E+00 | ND       | ND       | ND       | ND       | ND       | ND       |
| HOP7     | ND       | ND       | ND       | 1.88E+01 | 1.65E+01 | 7.13E+00 | ND       | ND       | ND       | ND       | ND       | ND       |
| HOP8     | ND       | ND       | ND       | 1.52E+01 | 1.42E+01 | 6.47E+00 | ND       | ND       | ND       | ND       | 1.63E+00 | ND       |
| HOP9     | ND       | ND       | ND       | 1.00E+01 | 1.09E+01 | 4.08E+00 | ND       | ND       | ND       | ND       | ND       | ND       |
| FLT      | 2.28E+01 | 8.91E-01 | 4.82E+01 | 1.94E+01 | 3.49E+01 | 1.31E+01 | 6.63E+00 | 3.72E-01 | 3.36E+01 | 8.80E-01 | 2.04E-01 | 5.28E+00 |
| ACE      | 8.76E+00 | ND       | 1.38E+01 | 8.91E+00 | 1.40E+01 | 7.75E+00 | ND       | ND       | 2.42E+01 | 3.48E-01 | 1.52E-01 | 1.57E+00 |
| PYR      | 1.30E+01 | 5.52E-02 | 2.84E+01 | 4.82E+00 | 1.27E+01 | 1.16E+01 | 2.35E-01 | 3.79E-01 | 1.90E+01 | 6.64E-01 | 6.69E-02 | 2.02E+00 |
| BaA      | 1.30E+01 | 2.11E-02 | 2.13E+01 | 6.15E+00 | 1.08E+01 | 4.15E+00 | 1.69E+00 | ND       | 2.80E+01 | ND       | ND       | 1.03E+00 |
| CHR      | 1.56E+02 | 2.68E-02 | 2.90E+02 | 1.60E+01 | 4.49E+01 | 1.72E+01 | 5.10E+00 | ND       | 3.18E+02 | ND       | ND       | 4.30E+00 |
| BbF      | 2.40E+01 | ND       | 1.72E+01 | 3.43E+01 | 2.62E+01 | 8.04E+00 | 2.18E+00 | 1.24E+00 | 2.98E+01 | ND       | ND       | ND       |
| BaP+BeP  | 1.71E+01 | 1.43E-01 | 1.31E+01 | 1.90E+01 | 1.53E+01 | 4.32E+00 | 5.41E+00 | 3.14E+00 | 1.78E+01 | 1.04E+00 | 7.83E-01 | 8.43E-01 |
| PER      | 2.24E+00 | ND       | 1.56E+00 | 7.36E+00 | 5.17E+00 | 1.51E+00 | 2.03E-01 | ND       | 3.41E+00 | ND       | 7.15E-02 | ND       |
| IPY      | 1.30E+01 | 4.50E-02 | 5.84E-01 | 2.50E+01 | 1.31E+01 | 1.65E+00 | ND       | 8.16E-01 | 9.40E+00 | 4.53E-01 | 4.97E-01 | 2.77E-01 |
| BPE      | 8.63E+00 | 1.54E-01 | 8.07E-01 | 3.03E+01 | 2.72E+01 | 5.49E+00 | ND       | 9.32E-01 | 7.02E+00 | 5.97E-01 | 4.33E-01 | 1.22E+00 |
| DaA      | 2.61E+00 | ND       | 8.41E-02 | 7.09E+00 | 6.29E+00 | ND       | ND       | 4.04E-02 | 2.42E+00 | ND       | 8.03E-02 | 1.64E-02 |
| COR      | ND       | ND       | ND       | 3.21E+01 | 3.49E+01 | 1.45E+01 | ND       | ND       | ND       | ND       | ND       | ND       |
| RET      | ND       | 2.98E+01 | ND       | ND       | ND       |
| LEV      | 7.81E+03 | 3.59E+03 | 1.11E+04 | 2.92E+03 | 2.71E+04 | 1.82E+04 | 4.46E+04 | 6.28E+03 | 1.30E+05 | 1.37E+04 | 4.35E+03 | 4.23E+03 |
| CHO      | 7.88E+01 | 6.26E+01 | 8.08E+01 | 1.18E+01 | 2.10E+01 | 1.45E+01 | 1.08E+01 | 1.13E+01 | 8.95E+00 | 1.04E+01 | 3.70E+00 | 8.28E+00 |
| C10-Acid | ND       | ND       | ND       | ND       | 2.18E+03 | ND       |
| C11-Acid | ND       | ND       | ND       | ND       | 8.08E+02 | ND       |
| C12-Acid | ND       | ND       | ND       | ND       | 1.85E+02 | 7.20E+02 | ND       | 5.66E+02 | ND       | ND       | ND       | 2.03E+02 |
| C13-Acid | ND       | ND       | ND       | ND       | 8.70E+02 | 5.16E+02 | ND       | 2.00E+02 | ND       | ND       | ND       | 7.50E+01 |
| C14-Acid | 4.59E+03 | 1.02E+03 | 8.02E+03 | 9.16E+02 | 1.48E+04 | 1.18E+03 | 3.00E+03 | 4.57E+03 | 1.84E+03 | 1.70E+03 | 1.40E+03 | 2.12E+03 |
| C15-Acid | 1.56E+03 | 1.17E+03 | 4.45E+03 | 6.34E+02 | 2.87E+03 | 1.14E+03 | 2.09E+03 | 1.98E+03 | 7.35E+02 | 1.01E+03 | 8.66E+02 | 5.53E+02 |
| C16-Acid | 1.93E+04 | 4.14E+03 | 2.66E+04 | 2.26E+03 | 5.19E+04 | 3.17E+03 | 1.09E+04 | 6.91E+03 | 5.08E+03 | 3.67E+03 | 2.22E+03 | 1.12E+04 |
| C17-Acid | 4.94E+03 | 9.23E+02 | 5.74E+03 | ND       | 7.58E+02 | 1.75E+02 | 3.89E+02 | 4.16E+02 | 6.84E+02 | 2.60E+02 | 1.55E+02 | 1.46E+02 |
| C18-Acid | 1.28E+03 | 4.17E+02 | 2.62E+03 | 3.12E+02 | 9.75E+02 | 3.50E+02 | 4.16E+02 | 4.22E+02 | 7.57E+02 | 3.02E+02 | 1.97E+02 | 2.75E+02 |
| C19-Acid | 6.20E+00 | ND       | 2.22E+02 | ND       |
| C20-Acid | ND       | ND       | 7.39E+02 | 3.37E+01 | ND       | ND       | ND       | 3.76E+01 | 1.13E+02 | 7.15E+01 | 3.11E+01 | 2.61E+01 |
| C21-Acid | 7.83E+00 | ND       | 9.31E+02 | ND       |
| C22-Acid | ND       | ND       | 3.93E+02 | ND       | ND       | ND       | 3.46E+01 | 2.24E+01 | ND       | 4.49E+01 | 2.11E+01 | ND       |
| C23-Acid | 5.81E+02 | ND       | 6.79E+02 | ND       | ND       | ND       | 6.72E+01 | 2.45E+01 | 2.73E+02 | 1.06E+02 | 1.16E+01 | ND       |
| C24-Acid | 1.35E+02 | ND       | 3.68E+02 | 6.36E+01 | ND       | ND       |
| C25-Acid | 1.41E+01 | ND       | 4.43E+02 | ND       | ND       | ND       | 7.45E+01 | ND       | ND       | 1.88E+01 | ND       | 3.68E+01 |
| C26-Acid | 3.07E+00 | ND       | ND       | ND       | ND       | ND       | 7.45E+01 | 2.80E+01 | 1.26E+02 | 1.04E+02 | ND       | 4.43E+01 |
| C27-Acid | ND       | ND       | ND       | ND       | ND       | ND       | 6.91E+01 | ND       | 8.66E+01 | 1.74E+01 | ND       | ND       |
| C29-Acid | ND       | 8.22E+01 | ND       | ND       | ND       |
| GUA      | ND       | ND       | ND       | 1.18E+01 | 7.18E+00 | 8.06E+00 | ND       | 1.10E+01 | 2.84E+00 | 3.77E+00 | ND       | ND       |
| MGUA     | ND       |
| MSYR     | ND       | 1.37E+02 | ND       | ND       | ND       |
| SYA      | ND       | 2.95E+03 | ND       | ND       | ND       |

|            |          |          |          |          |          |          |          |          |          |          |          |          |
|------------|----------|----------|----------|----------|----------|----------|----------|----------|----------|----------|----------|----------|
| VAN        | ND       | 6.73E+02 | ND       | ND       | ND       |
| IVAN       | ND       | 3.48E+02 | ND       | ND       | ND       |
| AB-Acid    | ND       | 6.91E+03 | ND       | ND       | ND       |
| DHAB-Acid  | ND       | 4.50E+03 | ND       | ND       | ND       |
| ODHAB-Acid | 8.43E+02 | ND       | 6.87E+02 | ND       | 1.45E+01 | 5.12E+01 | 0.00E+00 | 7.75E+01 | 3.31E+03 | 8.53E+01 | 4.04E+01 | ND       |
| PIM-Acid   | ND       | 9.43E+02 | ND       | ND       | ND       |
| IPIM-Acid  | ND       | 8.08E+02 | ND       | ND       | ND       |
| CPIN-Acid  | ND       | 1.20E+02 | ND       | 8.18E+01 | 4.59E+01 | 4.21E+00 |
| OLE-Acid   | 1.01E+03 | 3.41E+02 | 2.41E+03 | ND       | ND       | ND       | 4.00E+01 | 9.95E+01 | 5.12E+02 | 2.10E+01 | 3.83E+01 | 8.98E+01 |
| OC         | 5.56E+05 | 9.91E+04 | 8.58E+05 | 1.97E+05 | 4.62E+05 | 1.55E+05 | 2.33E+05 | 2.36E+05 | 5.14E+05 | 1.34E+05 | 1.59E+05 | 1.57E+05 |

**Table S2.** Organic composition uncertainty of organic markers (ng/mg) for each source emission profile. Codes are per Table 2 of the manuscript; ND = not detected.

| Code | CAF      | CAR      | CAS      | TLL      | CC       | TP       | PMX      | PSN      | QB       | RTD      | RTN      | RP       |
|------|----------|----------|----------|----------|----------|----------|----------|----------|----------|----------|----------|----------|
| C19  | ND       | ND       | ND       | 3.19E-01 | 1.91E+00 | 4.62E+00 | ND       | ND       | ND       | ND       | ND       | ND       |
| C20  | 5.53E-01 | ND       | ND       | 1.18E+00 | 4.51E+00 | 7.79E+01 | ND       | ND       | 1.47E+00 | ND       | ND       | ND       |
| C21  | ND       | ND       | 1.32E+01 | 1.83E+00 | 4.64E+00 | ND       | ND       | ND       | 5.03E+00 | ND       | ND       | ND       |
| C22  | 5.46E+00 | ND       | 8.76E+00 | 2.88E+01 | 3.48E+00 | 2.58E+01 | ND       | ND       | 3.23E+00 | ND       | ND       | ND       |
| C23  | 1.50E+00 | 9.94E-01 | 5.93E+00 | 9.23E+01 | 1.40E+01 | 6.16E+01 | 7.01E+00 | ND       | 4.97E+00 | 1.02E+01 | 2.67E+00 | ND       |
| C24  | 1.35E-01 | 1.06E+00 | 1.72E+01 | 1.61E+02 | 2.49E+01 | 9.09E+01 | 2.38E+01 | 2.47E+01 | 1.19E+01 | 2.21E+01 | 9.83E+00 | 1.50E+01 |
| C25  | 3.33E+00 | 1.95E+00 | 7.86E+00 | 2.31E+02 | 3.15E+01 | 1.10E+02 | 2.95E+01 | 3.19E+01 | 1.58E+01 | 2.98E+01 | 1.33E+01 | 1.81E+01 |
| C26  | ND       | 7.54E-01 | 2.40E+00 | 1.03E+02 | 2.30E+01 | 4.54E+01 | 1.61E+01 | 2.07E+01 | 1.20E+01 | 2.25E+01 | 9.72E+00 | 9.83E+00 |
| C27  | 3.14E+01 | 2.22E+00 | 2.86E+00 | 1.08E+02 | 2.67E+01 | 5.61E+01 | 2.12E+01 | 2.69E+01 | 2.17E+01 | 2.87E+01 | 1.24E+01 | 1.25E+01 |
| C28  | 1.83E+01 | 2.85E+00 | 3.02E+00 | 1.48E+02 | 3.66E+01 | 5.93E+01 | 2.17E+01 | 3.37E+01 | 1.95E+01 | 3.16E+01 | 1.22E+01 | 1.53E+01 |
| C29  | 9.12E+00 | 4.56E+00 | 2.94E+00 | 1.19E+02 | 2.82E+01 | 6.38E+01 | 2.26E+01 | 2.37E+01 | 1.71E+01 | 3.59E+01 | 1.47E+01 | 1.29E+01 |
| C30  | 6.88E+00 | 2.03E+00 | ND       | 1.18E+02 | 2.37E+01 | 5.01E+01 | 1.83E+01 | 1.94E+01 | 1.40E+01 | 2.75E+01 | 1.10E+01 | 1.07E+01 |
| C31  | 7.70E+00 | 1.87E+00 | 3.00E+00 | 1.12E+02 | 2.87E+01 | 5.56E+01 | 1.67E+01 | 2.31E+01 | 8.25E+00 | 2.79E+01 | 1.00E+01 | 1.04E+01 |
| C32  | ND       | ND       | ND       | 7.18E+01 | 1.15E+01 | 2.10E+01 | ND       | 7.52E+00 | 4.90E+00 | 1.61E+01 | 5.80E+00 | 1.26E+00 |
| C33  | ND       | ND       | ND       | 4.32E+01 | 9.74E+00 | 1.25E+01 | ND       | 1.73E+00 | 6.50E+00 | 1.19E+01 | 3.89E+00 | ND       |
| C34  | ND       | 1.18E+00 | ND       | ND       |
| HOP1 | 5.00E-01 | ND       | ND       | 1.35E+00 | 1.26E+00 | 4.16E+00 | 7.25E+00 | 6.16E+00 | ND       | 3.42E+00 | 2.08E+00 | 6.46E-01 |
| HOP2 | 5.99E-01 | ND       | ND       | 2.04E+00 | 1.10E+00 | 3.18E+00 | 1.06E+00 | ND       | ND       | 2.31E-01 | 6.08E-01 | ND       |
| HOP3 | 9.09E-01 | ND       | ND       | 8.30E+00 | 3.40E+00 | 1.03E+01 | 3.48E+00 | ND       | ND       | 7.16E-01 | 1.13E+00 | ND       |
| HOP4 | 1.06E-01 | ND       | ND       | 1.72E+00 | 8.97E-01 | 2.89E+00 | 4.55E+00 | ND       | ND       | 1.47E+00 | 2.52E-01 | ND       |
| HOP5 | 1.19E+00 | ND       | ND       | 9.20E+00 | 4.13E+00 | 1.46E+01 | 9.54E+00 | ND       | ND       | 2.98E+00 | 2.17E+00 | ND       |
| HOP6 | ND       | ND       | ND       | 4.59E+00 | 1.58E+00 | 4.79E+00 | ND       | ND       | ND       | ND       | ND       | ND       |
| HOP7 | ND       | ND       | ND       | 3.76E+00 | 1.43E+00 | 3.31E+00 | ND       | ND       | ND       | ND       | ND       | ND       |
| HOP8 | ND       | ND       | ND       | 3.03E+00 | 1.29E+00 | 2.84E+00 | ND       | ND       | ND       | ND       | 3.27E-01 | ND       |
| HOP9 | ND       | ND       | ND       | 2.01E+00 | 8.17E-01 | 2.19E+00 | ND       | ND       | ND       | ND       | ND       | ND       |

|          |          |          |          |          |          |          |          |          |          |          |          |          |
|----------|----------|----------|----------|----------|----------|----------|----------|----------|----------|----------|----------|----------|
| FLT      | 4.56E+00 | 1.78E-01 | 9.63E+00 | 3.89E+00 | 2.62E+00 | 6.97E+00 | 1.33E+00 | 7.44E-02 | 6.73E+00 | 1.76E-01 | 4.08E-02 | 1.06E+00 |
| ACE      | 1.75E+00 | ND       | 2.76E+00 | 1.78E+00 | 1.55E+00 | 2.79E+00 | ND       | ND       | 4.83E+00 | 6.96E-02 | 3.04E-02 | 3.13E-01 |
| PYR      | 2.59E+00 | 1.10E-02 | 5.67E+00 | 9.63E-01 | 2.31E+00 | 2.54E+00 | 4.71E-02 | 7.58E-02 | 3.79E+00 | 1.33E-01 | 1.34E-02 | 4.05E-01 |
| BaA      | 2.60E+00 | 4.22E-03 | 4.27E+00 | 1.23E+00 | 8.30E-01 | 2.16E+00 | 3.38E-01 | ND       | 5.60E+00 | ND       | ND       | 2.06E-01 |
| CHR      | 3.13E+01 | 5.36E-03 | 5.80E+01 | 3.21E+00 | 3.44E+00 | 8.99E+00 | 1.02E+00 | ND       | 6.35E+01 | ND       | ND       | 8.60E-01 |
| BbF      | 4.81E+00 | ND       | 3.44E+00 | 6.85E+00 | 1.61E+00 | 5.24E+00 | 4.36E-01 | 2.47E-01 | 5.96E+00 | ND       | ND       | ND       |
| BaP+BeP  | 3.42E+00 | 2.86E-02 | 2.62E+00 | 3.80E+00 | 8.64E-01 | 3.06E+00 | 1.08E+00 | 6.28E-01 | 3.56E+00 | 2.07E-01 | 1.57E-01 | 1.69E-01 |
| PER      | 4.48E-01 | ND       | 3.12E-01 | 1.47E+00 | 3.02E-01 | 1.03E+00 | 4.06E-02 | ND       | 6.82E-01 | ND       | 1.43E-02 | ND       |
| IPY      | 2.60E+00 | 9.00E-03 | 1.17E-01 | 5.00E+00 | 3.31E-01 | 2.63E+00 | ND       | 1.63E-01 | 1.88E+00 | 9.07E-02 | 9.94E-02 | 5.54E-02 |
| BPE      | 1.73E+00 | 3.08E-02 | 1.61E-01 | 6.07E+00 | 1.10E+00 | 5.45E+00 | ND       | 1.86E-01 | 1.40E+00 | 1.19E-01 | 8.65E-02 | 2.45E-01 |
| DaA      | 5.22E-01 | ND       | 1.68E-02 | 1.42E+00 | ND       | 1.26E+00 | ND       | 8.07E-03 | 4.84E-01 | ND       | 1.61E-02 | 3.28E-03 |
| COR      | ND       | ND       | ND       | 6.41E+00 | 2.91E+00 | 6.98E+00 | ND       | ND       | ND       | ND       | ND       | ND       |
| RET      | 1.56E+03 | 7.18E+02 | 2.21E+03 | 5.84E+02 | 3.64E+03 | 5.42E+03 | 8.93E+03 | 1.26E+03 | 2.60E+04 | 2.74E+03 | 8.70E+02 | 8.45E+02 |
| LEV      | 1.58E+01 | 1.25E+01 | 1.62E+01 | 2.36E+00 | 2.90E+00 | 4.19E+00 | 2.17E+00 | 2.27E+00 | 1.79E+00 | 2.08E+00 | 7.41E-01 | 1.66E+00 |
| CHO      | ND       | ND       | ND       | ND       | ND       | 4.36E+02 | ND       | ND       | ND       | ND       | ND       | ND       |
| C10-Acid | ND       | ND       | ND       | ND       | ND       | 1.62E+02 | ND       | ND       | ND       | ND       | ND       | ND       |
| C11-Acid | ND       | ND       | ND       | ND       | 1.44E+02 | 3.70E+01 | ND       | 1.13E+02 | ND       | ND       | ND       | 4.06E+01 |
| C12-Acid | ND       | ND       | ND       | ND       | 1.03E+02 | 1.74E+02 | ND       | 4.00E+01 | ND       | ND       | ND       | 1.50E+01 |
| C13-Acid | 9.19E+02 | 2.05E+02 | 1.60E+03 | 1.83E+02 | 2.36E+02 | 2.96E+03 | 6.00E+02 | 9.14E+02 | 3.69E+02 | 3.39E+02 | 2.81E+02 | 4.25E+02 |
| C14-Acid | 3.11E+02 | 2.34E+02 | 8.90E+02 | 1.27E+02 | 2.27E+02 | 5.74E+02 | 4.18E+02 | 3.97E+02 | 1.47E+02 | 2.02E+02 | 1.73E+02 | 1.11E+02 |
| C15-Acid | 3.86E+03 | 8.28E+02 | 5.31E+03 | 4.52E+02 | 6.35E+02 | 1.04E+04 | 2.18E+03 | 1.38E+03 | 1.02E+03 | 7.35E+02 | 4.45E+02 | 2.25E+03 |
| C16-Acid | 9.88E+02 | 1.85E+02 | 1.15E+03 | ND       | 3.51E+01 | 1.52E+02 | 7.77E+01 | 8.31E+01 | 1.37E+02 | 5.20E+01 | 3.10E+01 | 2.93E+01 |
| C17-Acid | 2.56E+02 | 8.35E+01 | 5.25E+02 | 6.24E+01 | 7.00E+01 | 1.95E+02 | 8.32E+01 | 8.44E+01 | 1.51E+02 | 6.03E+01 | 3.94E+01 | 5.49E+01 |
| C18-Acid | 1.24E+00 | ND       | 4.43E+01 | ND       |
| C19-Acid | ND       | ND       | 1.48E+02 | 6.74E+00 | ND       | ND       | ND       | 7.52E+00 | 2.26E+01 | 1.43E+01 | 6.21E+00 | 5.21E+00 |
| C20-Acid | 1.57E+00 | ND       | 1.86E+02 | ND       |
| C21-Acid | ND       | ND       | 7.86E+01 | ND       | ND       | ND       | 6.93E+00 | 4.48E+00 | ND       | 8.98E+00 | 4.23E+00 | ND       |
| C22-Acid | 1.16E+02 | ND       | 1.36E+02 | ND       | ND       | ND       | 1.34E+01 | 4.90E+00 | 5.47E+01 | 2.13E+01 | 2.32E+00 | ND       |
| C23-Acid | 2.70E+01 | ND       | 7.37E+01 | 1.27E+01 | ND       | ND       |
| C24-Acid | 2.82E+00 | ND       | 8.86E+01 | ND       | ND       | ND       | 1.49E+01 | ND       | ND       | 3.76E+00 | ND       | 7.35E+00 |
| C25-Acid | 6.14E-01 | ND       | ND       | ND       | ND       | ND       | 1.49E+01 | 5.60E+00 | 2.52E+01 | 2.07E+01 | ND       | 8.86E+00 |
| C26-Acid | ND       | ND       | ND       | ND       | ND       | ND       | 1.38E+01 | ND       | 1.73E+01 | 3.48E+00 | ND       | ND       |
| C27-Acid | ND       | 1.64E+01 | ND       | ND       | ND       |
| C29-Acid | ND       | ND       | ND       | 2.36E+00 | 1.61E+00 | 1.44E+00 | ND       | 2.20E+00 | 5.67E-01 | 7.54E-01 | ND       | ND       |
| GUA      | ND       |

|            |          |          |          |          |          |          |          |          |          |          |          |          |
|------------|----------|----------|----------|----------|----------|----------|----------|----------|----------|----------|----------|----------|
| MGUA       | ND       | 2.74E+01 | ND       | ND       | ND       |
| MSYR       | ND       | 5.91E+02 | ND       | ND       | ND       |
| SYA        | ND       | 1.35E+02 | ND       | ND       | ND       |
| VAN        | ND       | 6.96E+01 | ND       | ND       | ND       |
| IVAN       | ND       | 5.96E+00 | ND       | ND       | ND       |
| AB-Acid    | ND       | 1.38E+03 | ND       | ND       | ND       |
| DHAB-Acid  | ND       | 8.99E+02 | ND       | ND       | ND       |
| ODHAB-Acid | 1.69E+02 | ND       | 1.37E+02 | ND       | 1.02E+01 | 2.90E+00 | ND       | 1.55E+01 | 6.63E+02 | 1.71E+01 | 8.08E+00 | ND       |
| PIM-Acid   | ND       | 1.89E+02 | ND       | ND       | ND       |
| IPIM-Acid  | ND       | 1.62E+02 | ND       | ND       | ND       |
| CPIN-Acid  | ND       | 2.40E+01 | ND       | 1.64E+01 | 9.17E+00 | 8.43E-01 |
| OLE-Acid   | 2.02E+02 | 6.81E+01 | 4.83E+02 | ND       | ND       | ND       | 8.01E+00 | 1.99E+01 | 1.02E+02 | 4.20E+00 | 7.66E+00 | 1.80E+01 |
| OC         | 5.56E+05 | 9.91E+04 | 8.58E+05 | 1.97E+05 | 4.62E+05 | 1.55E+05 | 2.33E+05 | 2.36E+05 | 5.14E+05 | 1.34E+05 | 1.59E+05 | 1.57E+05 |
